# Supplementary material for: Autozygome Sequencing Expands the Horizon of Human Knockout Research and Provides Novel Insights into Human Phenotypic Variation
Source: PubMed Central journal article supplement (PMC3868571; doi:10.1371/journal.pgen.1004030), 2013-12-19

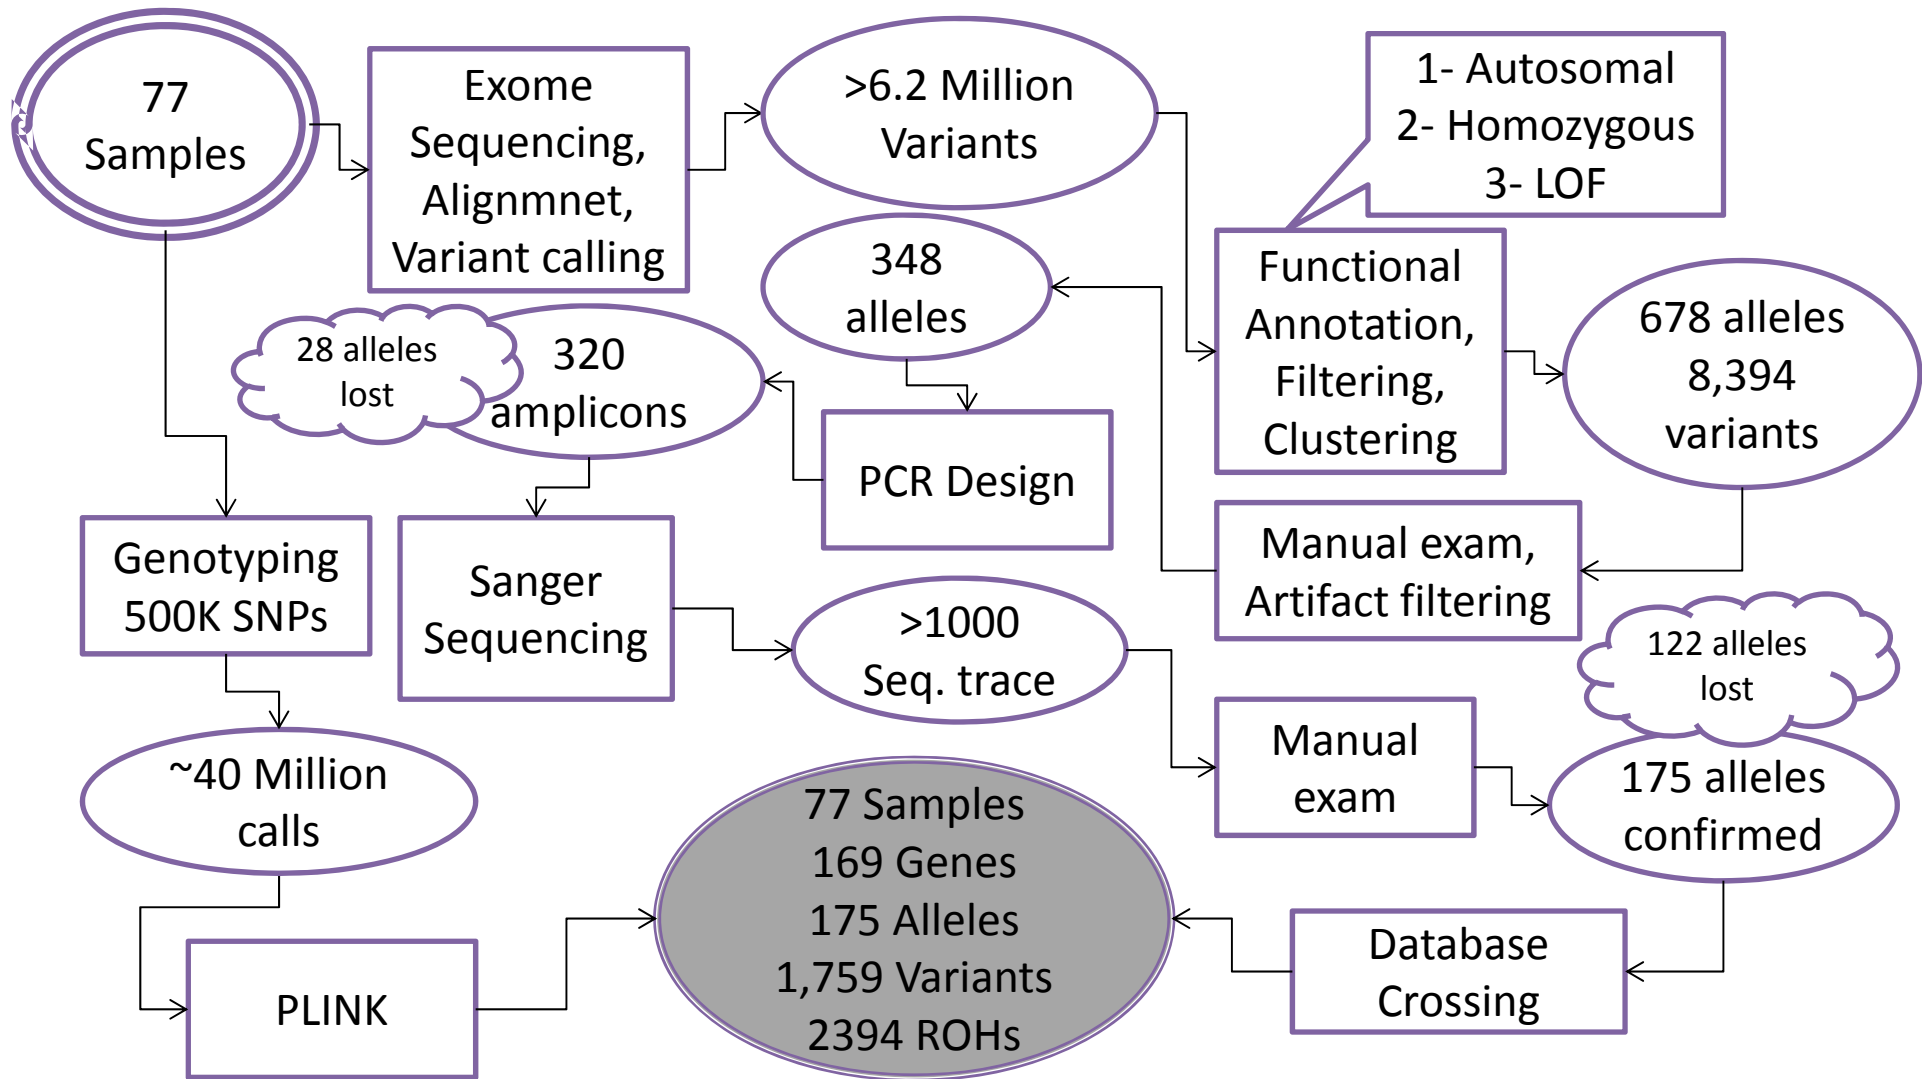

Supplement: pgen.1004030.s001.pdf [file pgen.1004030.s001.pdf]
